# Supplementary material for: Pooled library screening with multiplexed Cpf1 library
Source: PubMed Central journal article supplement (PMC6637147; doi:10.1038/s41467-019-10963-x), 2019-07-17
Supplement: 41467_2019_10963_MOESM1_ESM.pdf [file 41467_2019_10963_MOESM1_ESM.pdf]

**Pooled library screening with multiplexed  
Cpf1 library**

Liu et al

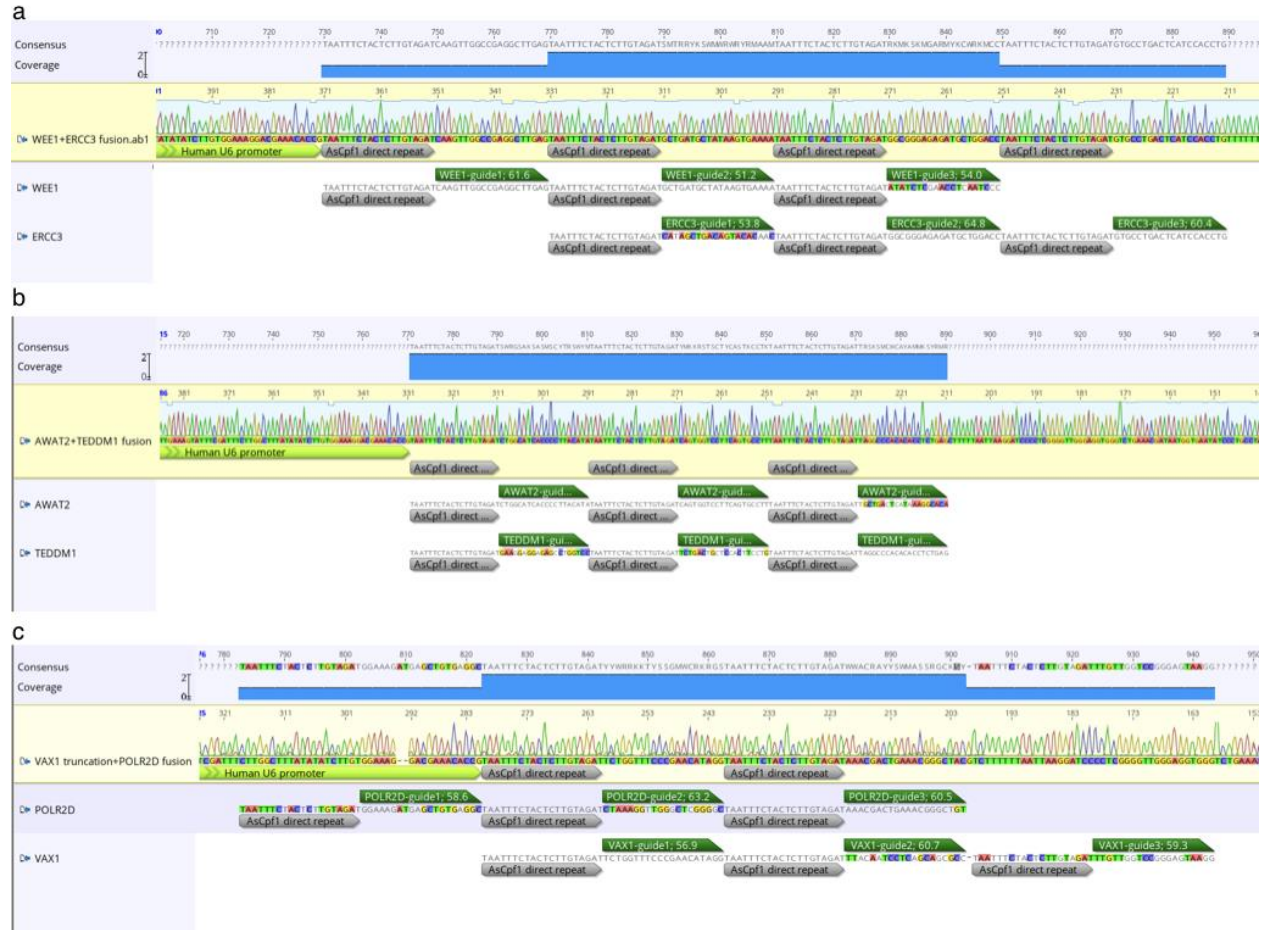

**Supplementary Figure 1 Examples of amplicon rearrangement caused by Gibson assembly.**

Sanger sequencing results of randomly picked colonies showing rearranged molecule generated from 2 different 3-guide array amplicon, resulting 4-guide hybrid (a), 3-guide hybrid (b), and truncated 2-guide hybrid(c).

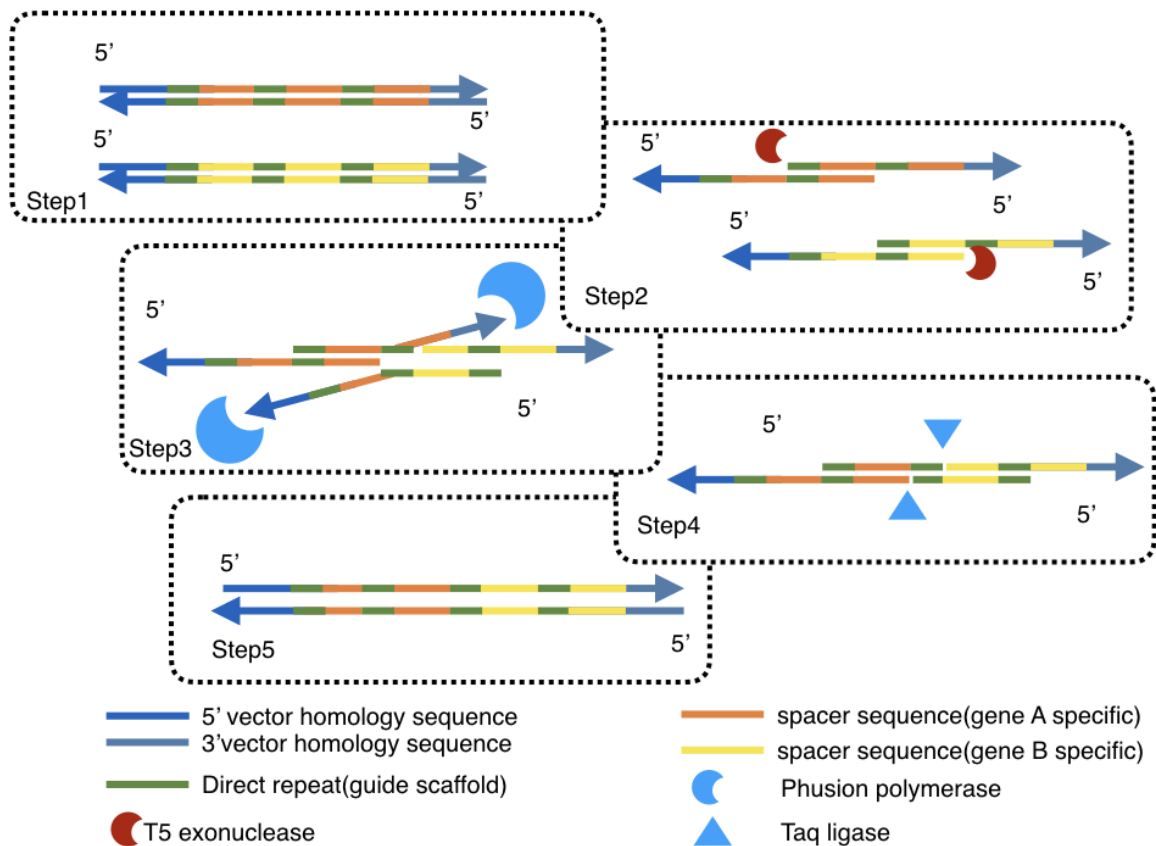

**Supplementary Figure 2 Proposed amplicon rearrangement caused by Gibson assembly.**

After PCR amplicon of oligo duplexes are added into Gibson assembly reaction (step 1), T5 exonuclease starts to erode the duplex from both strands' 5' terminals, exposing the direct repeat sequence of AsCpf1 guides as single strand ready for hybridization (step 2). Different guide arrays hybrid together because of homology in guides' direct repeats, leaving a long imperfect tail. Phusion polymerase binds to the tails and use its 3'->5' exonuclease activity to degrade the tails until it meets the perfect hybridization regions consisting of guide direct repeats (step 3). Taq polymerase seals nicks between the hybrid chains (step 4) and the recombined molecule is generated and cloned into vector (step 5).

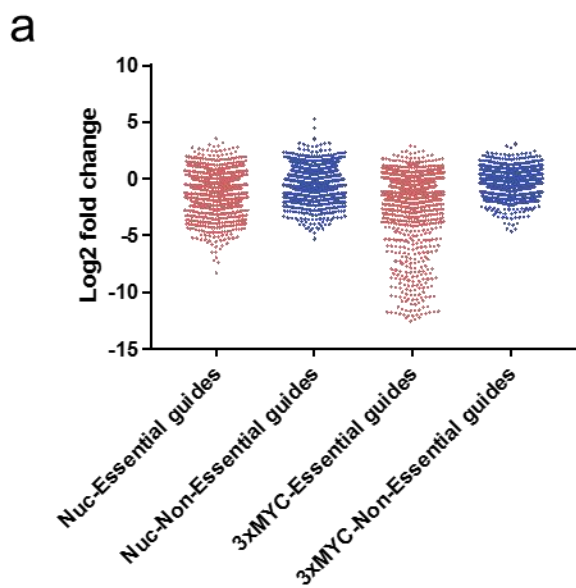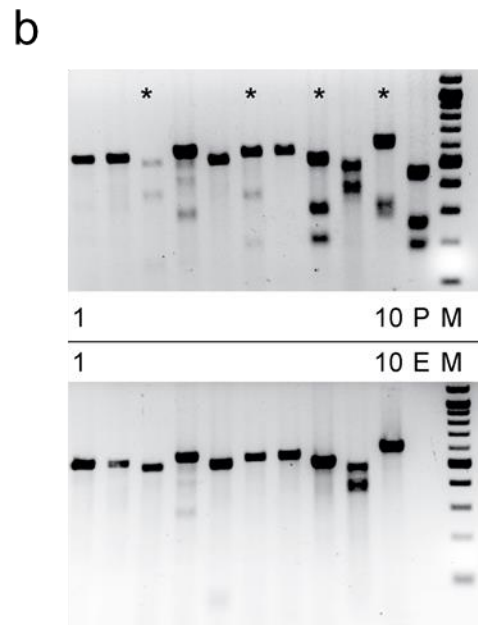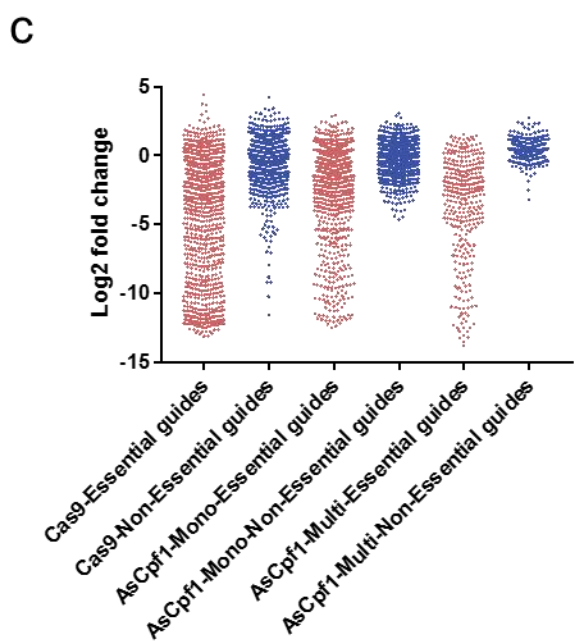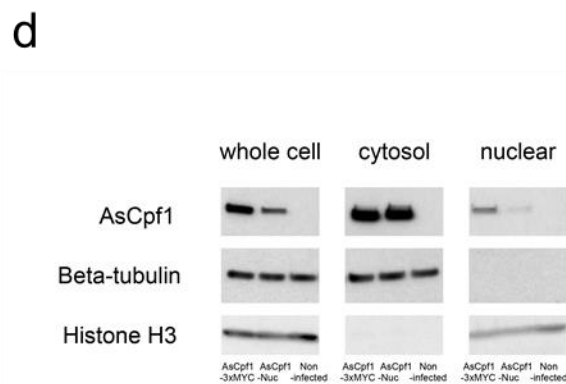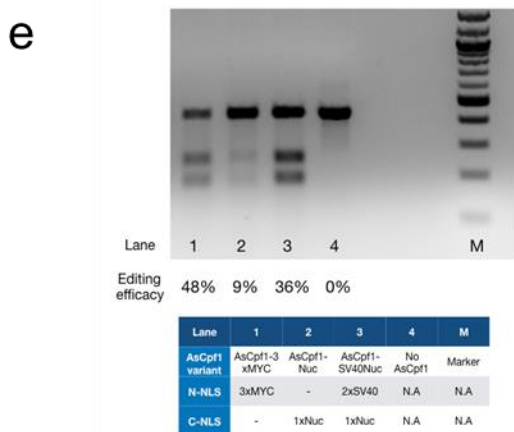

### **Supplementary Figure 3 AsCpf1 optimization for functional genomics**

**a.** Depletion of essential and non-essential gene targeting guide in AsCpf1-nuc variant and AsCpf1-3xMYC based screen. Pink: the mean value of log<sub>2</sub> transformed fold change of essential gene targeting guides at the endpoint, n=1026. Purple: the mean value of log<sub>2</sub> transformed fold change of non-essential gene targeting guides at the endpoint, n=1035. **b.** T7E1 assay of 10 different loci transfected with AsCpf1-nuc and corresponding guides. Active guides are indicated by “\*”. Upper panel: cells transfected with AsCpf1-nuc and guide. Lower panel: cells transfected with guides only. Lane1 to lane 10: T7E1 assay products targeting loci (from left to right) RESP18, NEUROD6, NAMPT, PRAMEF2, SLC22A9, COX7B2, TFAP2D, GUCY2F, ADAM30, and FNDC9. P: T7E1 assay product of DNMT1 edited allele as a positive control for T7 endonuclease activity. E: Empty lane. M: NEB 100bp DNA ladder. **c.** Depletion of essential and non-essential gene targeting guide in AsCpf1-3xMYC and SpCas9 based screen. Pink dot: the mean value of log<sub>2</sub> transformed fold change of essential gene targeting guides at the endpoint, n=1026 for SpCas9 and AsCpf1 based mono-cistronic library, n=342 for AsCpf1 based multiplexed library. Purple dot: the mean value of log<sub>2</sub> transformed fold change of non-essential gene targeting guides at the endpoint, n=1035 for SpCas9 and AsCpf1 based mono-cistronic library, n=345 for AsCpf1 based multiplexed library. **d.** Western blot of AsCpf1 variant. K-562 cells were infected with AsCpf1-Nuc (the commonly used variant) and AsCpf1-3xMYC (Kozak sequence and nucleus localization signal optimized variant) virus at the same multiplicity of infection **e.** T7E1 assay results of AsCpf1 variants on locus DNMT1. HEK293-T cells were transfected with different AsCpf1 variants and guide targeting DNMT1 locus (lane 1-3) in complexed with lipofectamine 3000. 3xMYC (3x tandem MYC NLS), 2x SV40 (2x tandem SV40 NLS), 1xNuc(1x Nucleoplasmin NLS), N.A.(Not applicable). Lane 4: negative control with guide transfection only. Lane M: NEB 100bp DNA ladder. Source data are provided as a Source Data file.

**a**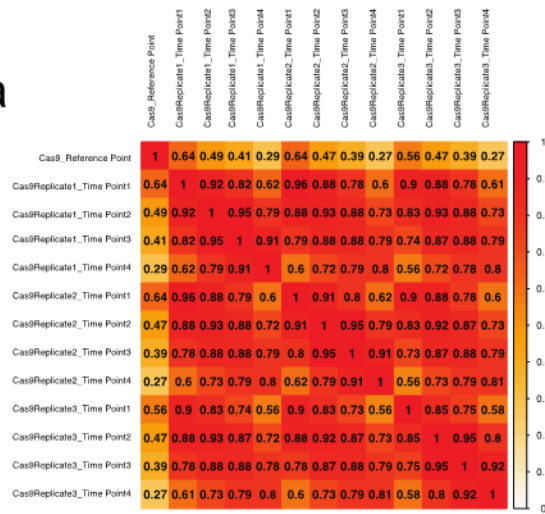**b**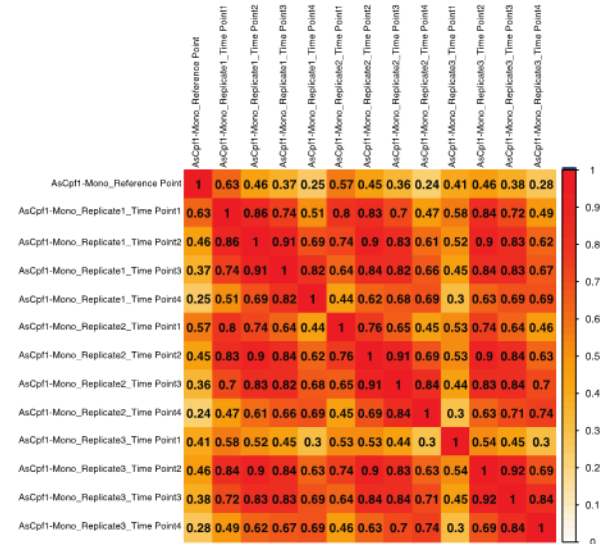**c**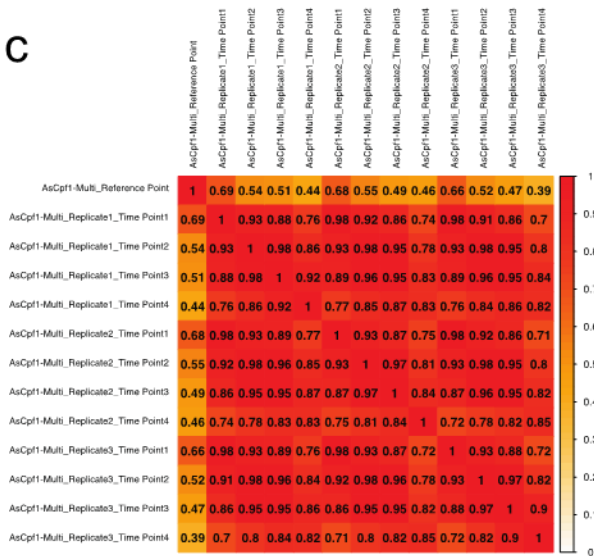**d**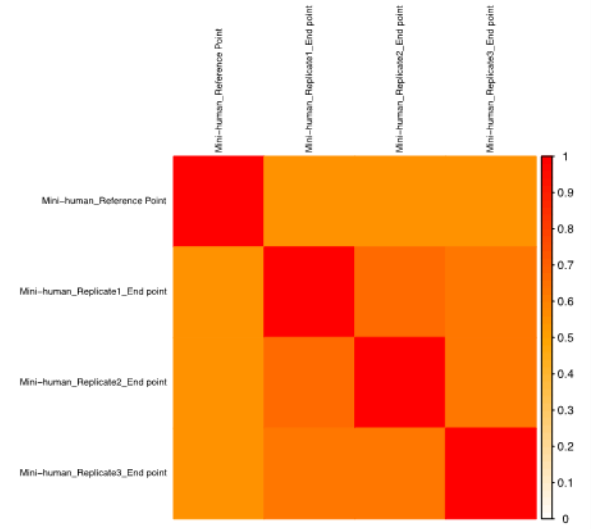

### Supplementary Figure 4 Correlation of replicates in the pooled screenings

Pearson correlation coefficient matrices of all samples for SpCas9 based mono-cistronic benchmark library screening **(a)**, AsCpf1 based mono-cistronic benchmark library screening **(b)**, AsCpf1 based multiplexed benchmark library screening **(c)**. Mini-human genome-wide screening **(d)**. Raw reads counts were used for the analysis. Source data are provided as a Source Data file.

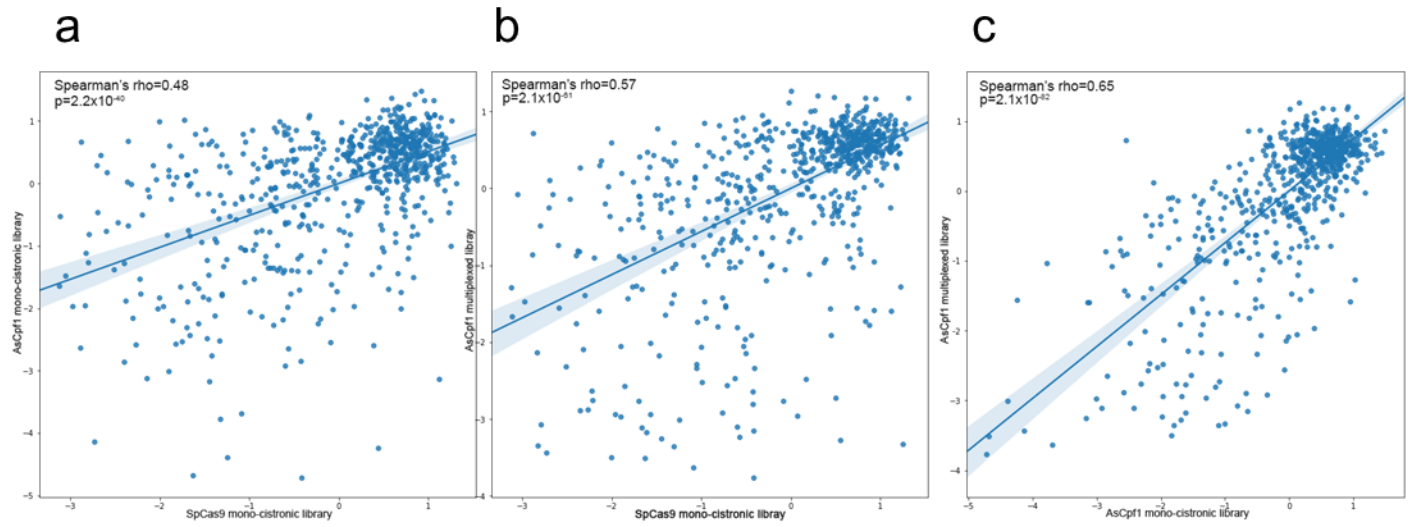

**Supplementary Figure 5 Correlation of hit's ranks between different CRISPR libraries**

Rank's correlations between benchmark library AsCpf1-Mono vs Cas9 **(a)**, AsCpf1-Multi vs Cas9 **(b)**, AsCpf1-Multi vs AsCpf1-Mono **(c)**. Z scores of core-essential genes from each library were used. Line of best fit is plotted and the shaded area is presented as SD. Source data are provided as a Source Data file.

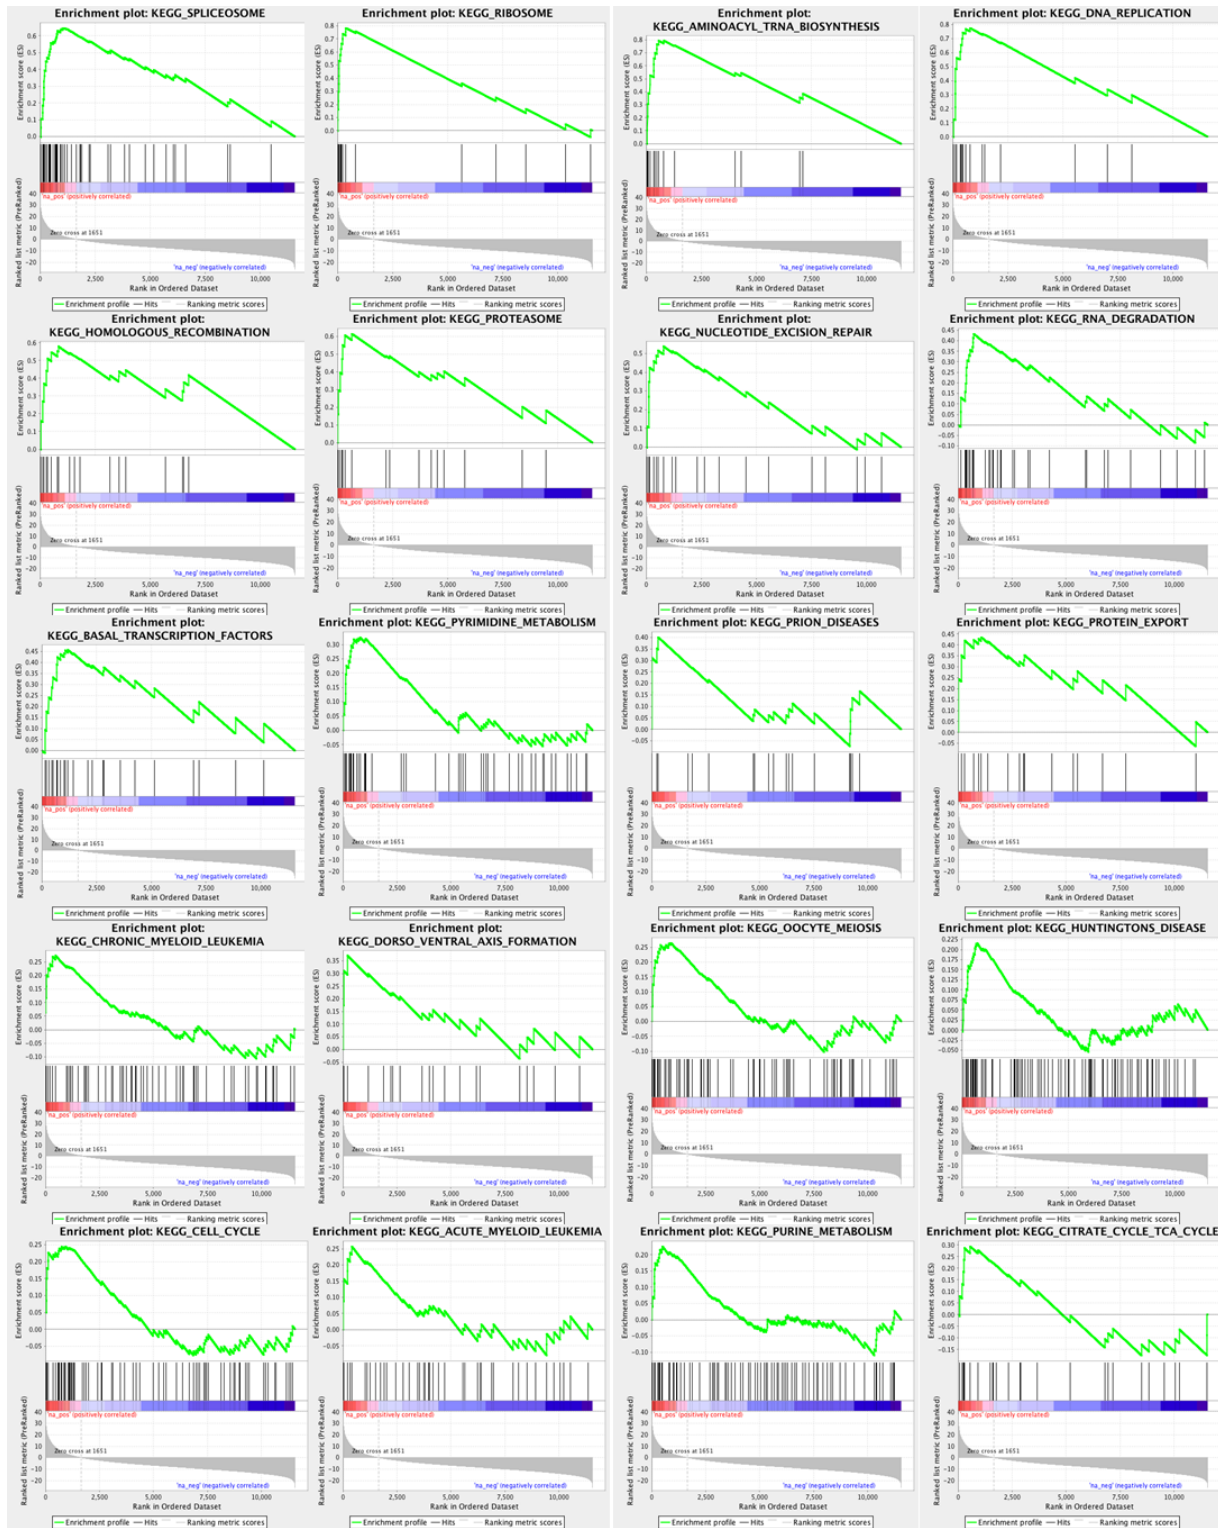

**Supplementary Figure 6 Top 20 depleted pathways with Wang library**

The gene level Bayesian factors (BF) generated from Wang library screen were used in the KEGG gene set enrichment analysis (GSEA). The enrichment plots of top 20 depleted pathways were listed.



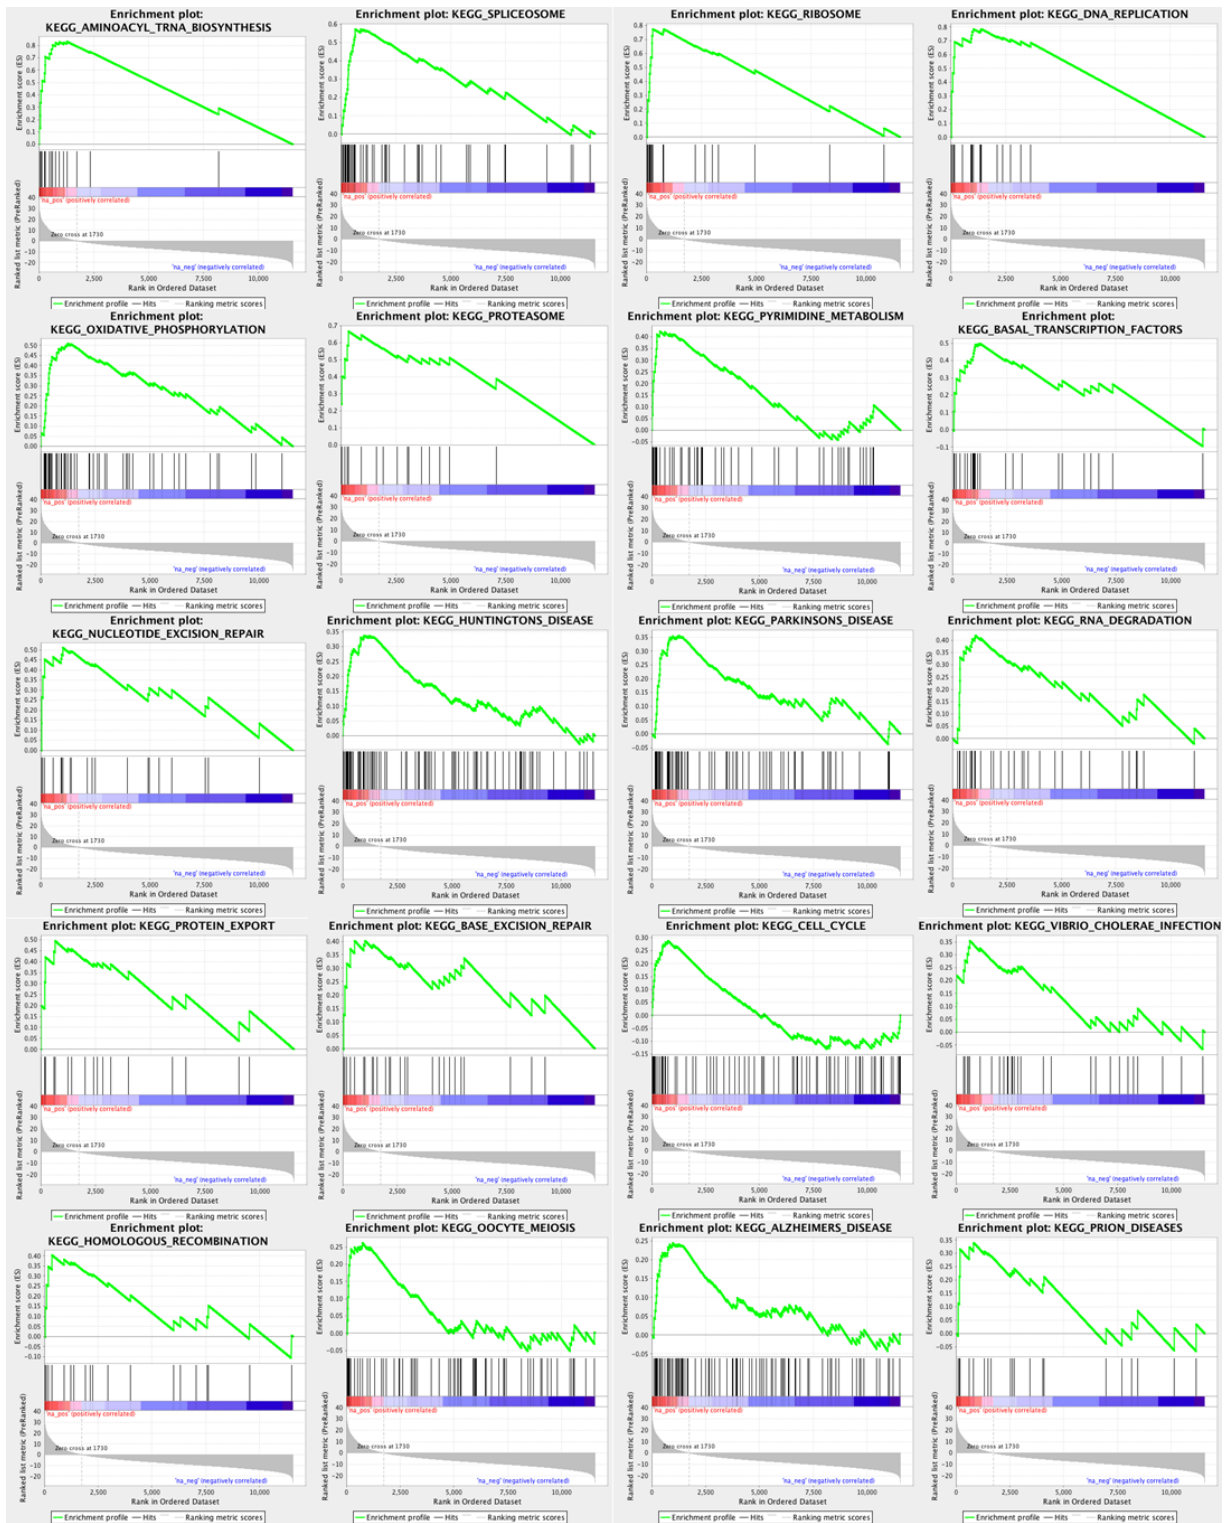

**Supplementary Figure 7 Top 20 depleted pathways with GeCKO V2 library**

The gene level Bayesian factors (BF) generated from GeCKOv2 library screen were used in the KEGG gene set enrichment analysis (GSEA). The enrichment plots of top 20 depleted pathways were listed.

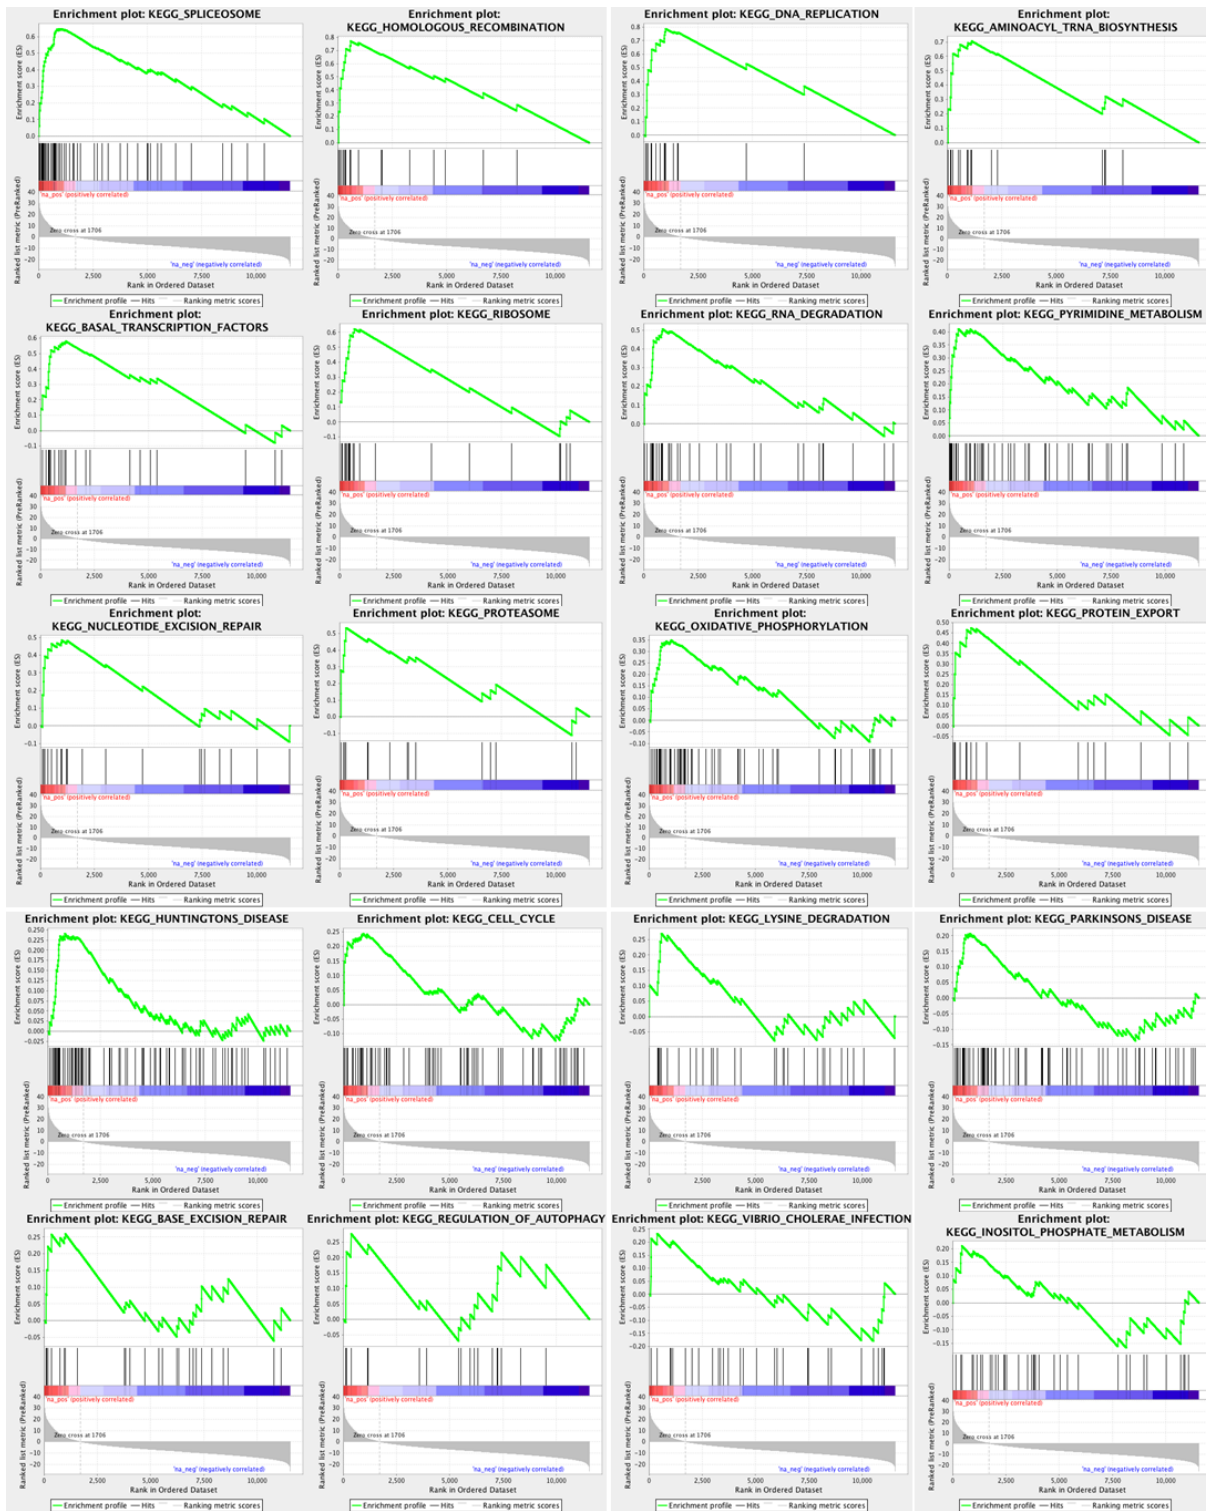

**Supplementary Figure 8 Top 20 depleted pathways with Mini-human library**

The gene level Bayesian factors (BF) generated from Mini-human library screen were used in the KEGG gene set enrichment analysis (GSEA). The enrichment plots of top 20 depleted pathways were listed.

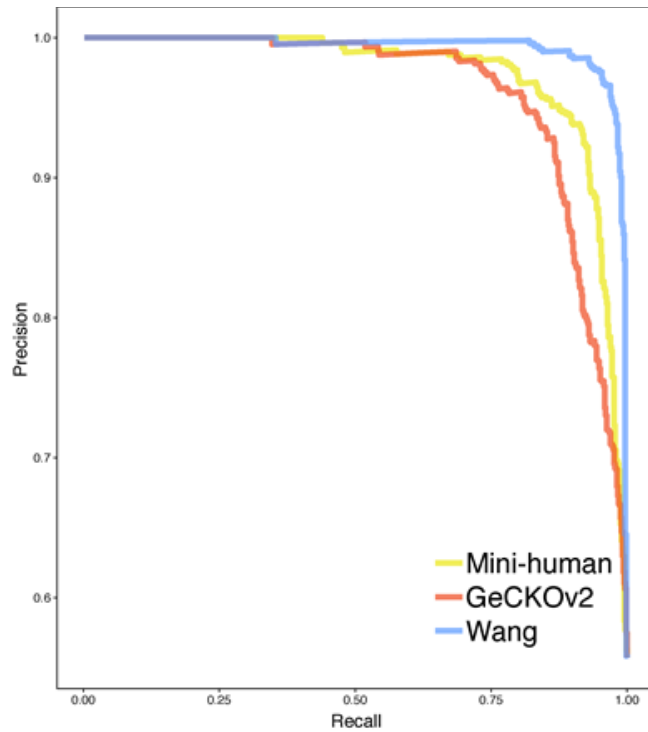

**Supplementary Figure 9 The precision-recall curve plot of different CRISPR library screen**

Blue curve: down-sampled Wang library (4 guides each gene). Red curve: GeCKO V2 library. Yellow curve: Mini-human library. Source data are provided as a Source Data file.

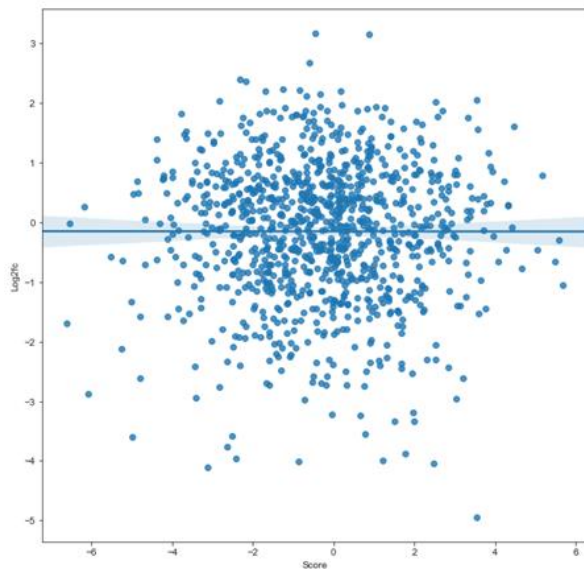

**Supplementary Figure 10 Activity scores and depletion correlation of non-essential gene targeting guides.**

Line of best fit is plotted and the shaded area is presented as SD. (Spearman's rho=-0.01, two-side p=0.65, Spearman's rank-order Correlation). Source data are provided as a Source Data file

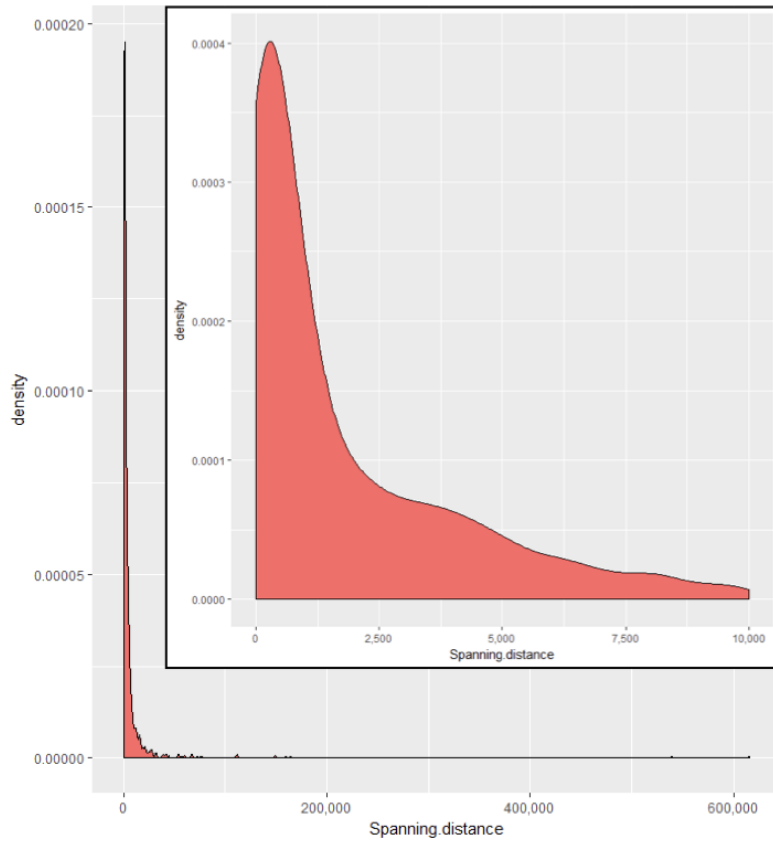

***Supplementary Figure 11 Maximum distance of double strand breaks in AsCpf1 multiplexed library.***

The maximum distance of double strand breaks was defined as the maximum distance of chromosomal coordinate between any two guides targeting the same gene. The upper enlarged right corner showed the distribution of the maximum distance shorter than 10 kilobases. Source data are provided as a Source Data file

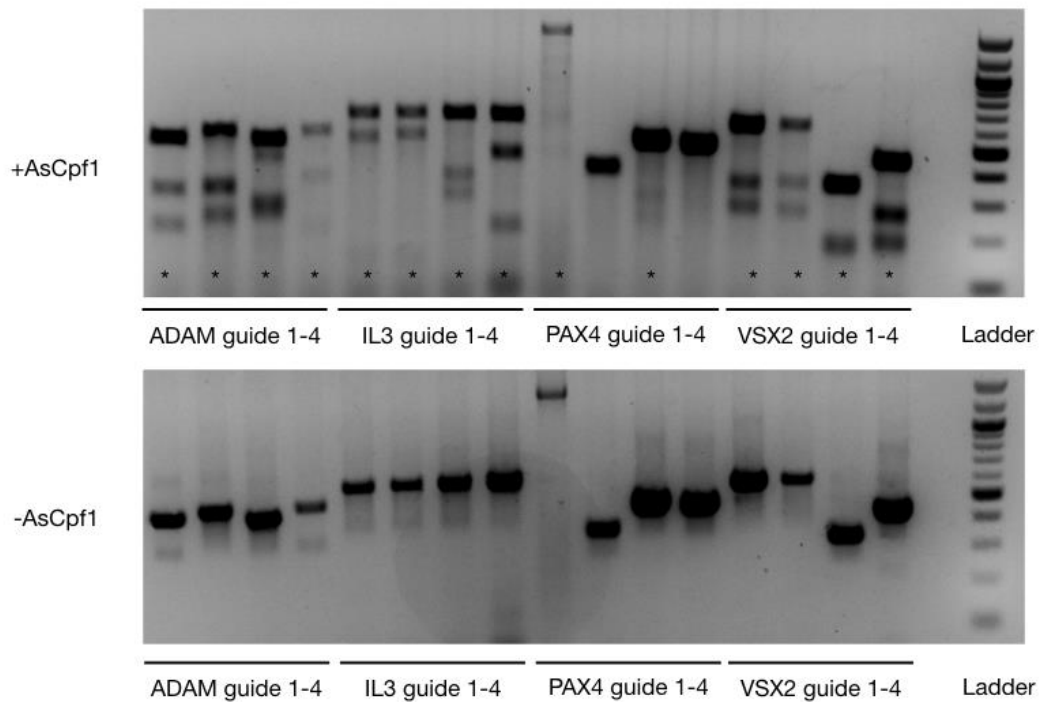

***Supplementary Figure 12 T7E1 assay results of AsCpf1 on non-essential gene loci.***

HEK293-T cells were transfected with AsCpf1-3xMYC and guides in complexed with lipofectamine 3000. Active guides are indicated by “\*”. Upper panel: cells transfected with AsCpf1-3xMYC and guide. Lower panel: cells transfected with guides only. T7E1 assay products targeting loci (from left to right): ADAM, IL3, PAX4, VSX2. For each locus, 4 guides were selected from Mini-human library. Ladder: NEB 100bp DNA ladder. Source data are provided as a Source Data file.

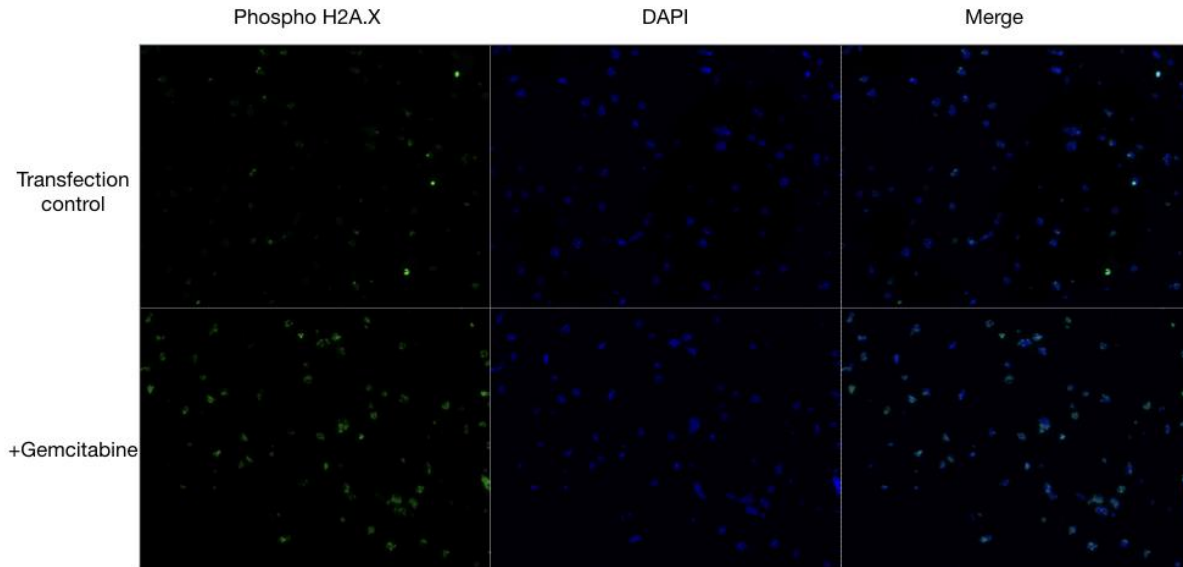

**Supplementary Figure 13 Immunofluorescence microscopy validation of p-H2A.X antibody.**

HEK293-T cells were transfected with AsCpf1-3xMYC and empty guide vector in complexed with Lipofectamine 3000 (Transfection control) or treated with 1-hour 100nM gemcitabine incubation (+Gemcitabine) and stained for H2A.X phosphorylation and nucleus. Source data are provided as a Source Data file.

|                                | Restriction digestion<br>(rearranged/total colony) | Gibson assembly<br>(rearranged/total colony) |
|--------------------------------|----------------------------------------------------|----------------------------------------------|
| NEB Stable<br>(Q5 polymerase)  | 0/8                                                | 2/10                                         |
| DH10B<br>(Q5 polymerase)       | Not tested                                         | 8/11                                         |
| NEB Stable<br>(KOD polymerase) | 0/9                                                | 3/9                                          |
| DH10B<br>(KOD polymerase)      | 0/10                                               | Not tested                                   |

**Supplementary Table.1 Rate of plasmid rearrangement using different library cloning techniques**

Oligo pools were PCR amplified with either KOD polymerase or NEB Q5 polymerase and then cloned into vector by either restrictive digestion or Gibson assembly. Ligation products were transformed into either

NEB stable strain or DH10B strain. Transformants were then subjected to sanger sequencing and mapped back to reference to detect whether vector recombination was present.

**Sequence of LentiUniversal-Puro vector:**

>LentiUniversal-Puro

CCCGGGTGC AAAGATGGATAAAAGTTTTAAACAGAGAGGAATCTTTGCAGCTAATGGACCTTCTA  
GGTCTTGAAAGGAGTGGGAATTGGCTCCGGTGCCCGTCAGTGGGCAGAGCGCACATCGCCCACA  
GTCCCCGAGAAGTTGGGGGGAGGGGTTCGGCAATTGATCCGGTGCCTAGAGAAGGTGGCGCGGGG  
TAAACTGGGAAAGTGATGTCGTGTA CTGGCTCCGCCTTTTTCCCGAGGGTGGGGGAGAACCGTA  
TATAAGTGCAGTAGTCGCCGTGAACGTTCTTTTTTCGCAACGGGTTTGCCGCCAGAACACAGGTA  
AGTGCCGTGTGTGGTTCCCGCGGGCCTGGCCTCTTTACGGGTTATGGCCCTTGCGTGCCTTGAA  
TTACTTCCACTGGCTGCAGTACGTGATTCTTGATCCCGAGCTTCGGGTGGAAAGTGGGTGGGAG  
AGTTCGAGGCCTTGCCTTAAGGAGCCCTTCGCCTCGTGCTTGAGTTGAGGCCTGGCCTGGGC  
GCTGGGGCCCGCCGCTGCGAATCTGGTGGCACCTTCGCGCCTGTCTCGCTGCTTTTCGATAAGTC  
TCTAGCCATTTAAAATTTTTGATGACCTGCTGCGACGCTTTTTTTCTGGCAAGATAGTCTTGTA  
AATGCGGGCCAAGATCTGCACACTGGTATTTTCGGTTTTTTGGGGCCGCGGGCGGCACGGGGCCC  
GTGCGTCCCAGCGCACATGTTTCGGCGAGGCGGGGCCTGCGAGCGCGGCCACCGAGAATCGGACG  
GGGTAGTCTCAAGCTGGCCGGCCTGCTCTGGTGCCTGGCCTCGCGCCGCGGTGTATCGCCCCG  
CCCTGGGCGGCAAGGCTGGCCCGGTTCGGCACCAGTTGCGTGAGCGGAAAGATGGCCGCTTCCCG  
GCCCTGCTGCAGGGAGCTCAAAATGGAGGACGCGGCGCTCGGGAGAGCGGGCGGGTGAGTCACC  
CACACAAAGGAAAAGGGCCTTTCCGTCTCAGCCGTGCTTCATGTGACTCCACGGAGTACCGG  
GCGCCGTCCAGGCACCTCGATTAGTTCTCGAGCTTTTGGAGTACGTGCTCTTAGGTTGGGGGG  
AGGGGTTTTATGCGATGGAGTTTCCCCACACTGAGTGGGTGGAGACTGAAGTTAGGCCAGCTTG  
GCACTTGATGTAATTCTCCTTGGAATTTGCCCTTTTTGAGTTTGGATCTTGGTTCATTCTCAAG  
CCTCAGACAGTGGTTCAAAGTTTTTTTTCTTCCATTTTCAGGTGTCGTGACGTACGGCCACCATGA  
CCGAGTACAAGCCCACGGTGCGCCTCGCCACCCGCGACGACGTCCCAGGGCCGTACGCACCCT  
CGCCGCGCGTTCGCCGACTACCCCGCCACGCGCCACACCGTCGATCCGGACC GCCACATCGAG  
CGGGTACCCGAGCTGCAAGAACTCTTCCTCACGCGCGTCCGGCTCGACATCGGCAAGGTGTGGG  
TCGCGGACGACGGCGCCCGCTGGCGGTCTGGACCACGCCGGAGAGCGTCAAGCGGGGGCGGT  
GTTTCGCCGAGATCGGCCCGCGCATGGCCGAGTTGAGCGGTTCCCGGCTGGCCGCGCAGCAACAG  
ATGGAAGGCCTCCTGGCGCCGCACCGGCCAAAGGAGCCCGGTGGTTCTGGCCACCGTCGGAG  
TCTCGCCCGACCACCAGGGCAAGGGTCTGGGCAGCGCCGTGCTGCTCCCCGGAGTGGAGGCGGC  
CGAGCGCGCCGGGGTGCCCGCCTTCCTGGAGACCTCCGCGCCCCGCAACCTCCCCTTCTACGAG  
CGGCTCGGCTTACCGTACCCGCCGACGTGAGGTGCCGAAGGACCGCGCACCTGGTGCATGA  
CCC GCAAGCCCGGTGCTGAACGCGTTAAGTCGACAATCAACCTCTGGATTACAAAATTTGTGA  
AAGATTGACTGGTATTCTTA ACTATGTTGCTCCTTTTTACGCTATGTGGATAACGCTGCTTTAATG  
CCTTTGTATCATGCTATTGCTTCCCGTATGGCTTTTCATTTTCTCCTCCTTGTATAAATCCTGGT  
TGCTGTCTCTTTATGAGGAGTTGTGGCCCGTTGTCAGGCAACGTGGCGTGGTGTGCACTGTGTT  
TGCTGACGCAACCCCCACTGGTTGGGGCATTGCCACCACCTGTCAGCTCCTTTCCGGGACTTTC  
GCTTTCCCCCTCCCTATTGCCACGGCGGA ACTCATCGCCGCTGCCTTGCCCGCTGCTGGACAG  
GGGCTCGGCTGTTGGGCACTGACAATTCCGTGGTGTGTCGGGGAAATCATCGTCTTTTCTTG  
GCTGCTCGCCTGTGTTGCCACCTGGATTCTGCGCGGGACGTCTTCTGCTACGTCCCTTCGGCC  
CTCAATCCAGCGGACCTTCTTCCCGCGGCCTGCTGCCGGCTCTGCGGCCTCTTCCGCGTCTTC  
GCCTTCGCCCTCAGACGAGTCGGATCTCCCTTTGGGCCGCCTCCCCGCGTCGACTTTAAGACCA  
ATGACTTACAAGGCAGCTGTAGATCTTAGCCACTTTTTAAAAGAAAAGGGGGGACTGGAAGGGC  
TAATTCACTCCCAACGAAGACAAGATCTGCTTTTTGCTTGTACTGGGTCTCTCTGGTTAGACCA

GATCTGAGCCTGGGAGCTCTCTGGCTAACTAGGGAACCCACTGCTTAAGCCTCAATAAAGCTTG  
CCTTGAGTGCTTCAAGTAGTGTGTGCCCGTCTGTTGTGTGACTCTGGTAACTAGAGATCCCTCA  
GACCCTTTTAGTCAGTGTGGAAAATCTCTAGCAGTACGTATAGTAGTTCATGTTCATCTTATTAT  
TCAGTATTTATAACTTGCAAAGAAATGAATATCAGAGAGTGAGAGGAACTTGTTTATTGCAGCT  
TATAATGGTTACAAATAAAGCAATAGCATCACAAATTTACAAATAAAGCATTTTTTTCACTGC  
ATTCTAGTTGTGGTTTTGTCCAAACTCATCAATGTATCTTATCATGTCTGGCTCTAGCTATCCCG  
CCCCTAACTCCGCCATCCCGCCCCTAACTCCGCCAGTTCGCCCCATTCTCCGCCCCATGGCT  
GACTAATTTTTTTTTATTTATGCAGAGGCCGAGGCCGCCTCGGCCTCTGAGCTATTCAGAAGTA  
GTGAGGAGGCTTTTTTGGAGGCCTAGGGACGTACCCAATTCGCCCTATAGTGAGTCGTATTACG  
CGCGCTCACTGGCCGTCGTTTTTACAACGTCGTGACTGGGAAAACCCTGGCGTTACCCAACCTTAA  
TCGCCTTGACGACATCCCCCTTTCGCCAGCTGGCGTAATAGCGAAGAGGCCCGCACCGATCGC  
CCTTCCCAACAGTTGCGCAGCCTGAATGGCGAATGGGACGCGCCCTGTAGCGGCGCATTAAGCG  
CGGCGGGTGTGGTGGTTACGCGCAGCGTGACCGCTACACTTGCCAGCGCCCTAGCGCCCGCTCC  
TTTCGCTTCTTCCCTTCCCTTCTC GCCACGTTTCGCCGGCTTTCCCGTCAAGCTCTAAATCGG  
GGGCTCCCTTTAGGGTTCCGATTTAGTGCTTTACGGCACCTCGACCCCAAAAAACTTGATTAGG  
GTGATGGTTCACGTAGTGGGCCATCGCCCTGATAGACGGTTTTTTCGCCCTTTGACGTTGGAGTC  
CACGTTCTTTAATAGTGGACTCTTGTTCCAAACTGGAACAACACTCAACCCTATCTCGGTCTAT  
TCTTTTGATTTATAAGGGATTTTGC CGATTTTCGGCCTATTGGTTAAAAAATGAGCTGATTTAAC  
AAAAATTTAACGCGAATTTTAAACAAAATATTAACGCTTACAATTTAGGTGGCACTTTTCGGGGA  
AATGTGCGCGGAACCCCTATTTGTTTATTTTTCTAAATACATTCAAATATGTATCCGCTCATGA  
GACAATAACCCTGATAAATGCTTCAATAATATTGAAAAAGGAAGAGTATGAGTATTCAACATTT  
CCGTGTCGCCCTTATTCCCTTTTTTGC GGCATTTTGCCTTCTGTTTTTGTCTACCCAGAAACG  
CTGGTGAAAGTAAAAGATGCTGAAGATCAGTTGGGTGCACGAGTGGGTACATCGAACTGGATC  
TCAACAGCGGTAAGATCCTTGAGAGTTTTCGCCCCGAAGAACGTTTTTCCAATGATGAGCACTTT  
TAAAGTTCTGCTATGTGGCGCGGTATTATCCCGTATTGACGCCGGGCAAGAGCAACTCGGTTCG  
CGCATACTATTCTCAGAATGACTTGGTTGAGTACTACCAGTACAGAAAAGCATCTTACGG  
ATGGCATGACAGTAAGAGAATTATGCAGTGCTGCCATAACCATGAGTGATAAAGCTGCGGCCAA  
CTTACTTCTGACAACGATCGGAGGACCGAAGGAGCTAACCGCTTTTTTGCACAACATGGGGGAT  
CATGTAACCTCGCCTTGATCGTTGGGAACCGGAGCTGAATGAAGCCATACCAAACGACGAGCGTG  
ACACCACGATGCCTGTAGCAATGGCAACAACGTTGCGCAAACCTATTAACCTGGCGAACTACTTAC  
TCTAGCTTCCCGGCAACAATTAATAGACTGGATGGAGGCGGATAAAGTTGCAGGACCACTTCTG  
CGCTCGGCCCTTCCGGCTGGCTGGTTTTATTGCTGATAAATCTGGAGCCGGTGAGCGTGGGTCTC  
GCGGTATCATTGCAGCACTGGGGCCAGATGGTAAGCCCTCCCGTATCGTAGTTATCTACACGAC  
GGGAGTCAGGCAACTATGGATGAACGAAATAGACAGATCGCTGAGATAGGTGCCTCACTGATT  
AAGCATTGGTAACTGTCAGACCAAGTTTACTCATATATACTTTAGATTGATTTAAAACCTTCATT  
TTTAATTTAAAAGGATCTAGGTGAAGATCCTTTTTTGATAATCTCATGACCAAAAATCCCTTAACG  
TGAGTTTTTCGTTCCACTGAGCGTCAGACCCCGTAGAAAAGATCAAAGGATCTTCTTGAGATCCT  
TTTTTTCTGCGCGTAATCTGCTGCTTGCAAACAAAAAACCACCGCTACCAGCGGTGGTTTTGTT  
TGCCGGATCAAGAGCTACCAACTCTTTTTCCGAAGGTAACCTGGCTTCAGCAGAGCGCAGATACC  
AAATACTGTTCTTCTAGTGTAGCCGTAGTTAGGCCACCCTTCAAGAACTCTGTAGCACCCGCT  
ACATACTCGCTCTGCTAATCCTGTTACCAGTGGCTGCTGCCAGTGGCGATAAGTCGTGTCTTA  
CCGGTTGGACTCAAGACGATAGTTACCGGATAAGGCGCAGCGGTCCGGCTGAACGGGGGGTTC  
GTGCACACAGCCCAGCTTGGAGCGAACGACCTACACCGAACTGAGATACCTACAGCGTGAGCTA  
TGAGAAAGCGCCACGCTTCCCGAAGGGAGAAAGGCGGACAGGTATCCGGTAAGCGGCAGGGTCG  
GAACAGGAGAGCGCACGAGGGAGCTTCCAGGGGGAAACGCCTGGTATCTTTATAGTCCTGTGCG  
GTTTTGCCACCTCTGACTTGAGCGTCGATTTTTGTGATGCTCGTCAGGGGGGCGGAGCCTATGG  
AAAAACGCCAGCAACGCGGCCTTTTTACGGTTCCTGGCCTTTTGCTGGCCTTTTGCTCACATGT



TCTTTCTGCGTTATCCCCTGATTCTGTGGATAACCGTATTACCGCCTTTGAGTGAGCTGATAC  
CGCTCGCCGCAGCCGAACGACCGAGCGCAGCGAGTCAGTGAGCGAGGAAGCGGAAGAGCGCCCA  
ATACGCAAACCGCCTCTCCCCGCGCGTTGGCCGATTCAATTAATGCAGCTGGCAGCAGAGGTTTC  
CCGACTGGAAAGCGGGCAGTGAGCGCAACGCAATTAATGTGAGTTAGCTCACTCATTAGGCACC  
CCAGGCTTTACACTTTATGCTTCCGGCTCGTATGTTGTGTGGAATTGTGAGCGGATAACAATTT  
CACACAGGAAACAGCTATGACCATGATTACGCCAAGCGCGCAATTAACCCTCACTAAAGGGAAC  
AAAAGCTGGAGCTGCAAGCTTAATGTAGTCTTATGCAATACTCTTGTAGTCTTGCAACATGGTA  
ACGATGAGTTAGCAACATGCCTTACAAGGAGAGAAAAAGCACCGTGCATGCCGATTGGTGGAAAG  
TAAGGTGGTACGATCGTGCCTTATTAGGAAGGCAACAGACGGGTCTGACATGGATTGGACGAAC  
CACTGAATTGCCGCATTGCAGAGATATTGTATTTAAGTGCCTAGCTCGATACATAAACGGGTCT  
CTCTGGTTAGACCAGATCTGAGCCTGGGAGCTCTCTGGCTAACTAGGGAACCCACTGCTTAAGC  
CTCAATAAAGCTTGCCTTGAGTGCCTCAAGTAGTGTGTGCCCGTCTGTTGTGTGACTCTGGTAA  
CTAGAGATCCCTCAGACCCTTTTAGTCAGTGTGGAAAATCTCTAGCAGTGGCGCCCGAACAGGG  
ACTTGAAAGCGAAAGGGAAACCAGAGGAGCTCTCTCGACGCAGGACTCGGCTTGCTGAAGCGCG  
CACGGCAAGAGGGCAGGGGGCGGCGACTGGTGAAGTACGCCAAAAATTTGACTAGCGGAGGCTAG  
AAGGAGAGAGATGGGTGCGAGAGCGTCAGTATTAAGCGGGGGAGAATTAGATCGCGATGGGAAA  
AAATTCGGTTAAGGCCAGGGGGAAAGAAAAAATATAAATTAACATATAGTATGGGCAAGCAG  
GGAGCTAGAACGATTGCGAGTTAATCCTGGCCTGTTAGAAACATCAGAAGGCTGTAGACAAATA  
CTGGGACAGCTACAACCATCCCTTCAGACAGGATCAGAAGAATTAGATCATTATATAATACAG  
TAGCAACCCTCTATTGTGTGCATCAAAGGATAGAGATAAAGACACCAAGGAAGCTTTAGACAA  
GATAGAGGAAGAGCAAAACAAAAGTAAGACCACCGCACAGCAAGCGGCCGCTGATCTTCAGACC  
TGGAGGAGGAGATATGAGGGACAATTGGAGAAGTGAATTATATAAATATAAAGTAGTAAAAAT  
GAACCATTAGGAGTAGCACCCACCAAGGCAAAGAGAAGAGTGGTGCAGAGAGAAAAAGAGCAG  
TGGGAATAGGAGCTTTGTTCCCTGGGTCTTGGGAGCAGCAGGAAGCACTATGGGCGCAGCGTC  
AATGACGCTGACGGTACAGGCCAGACAATTATTGTCTGGTATAGTGCAGCAGCAGAACAATTTG  
CTGAGGGCTATTGAGGCGCAACAGCATCTGTTGCAACTCACAGTCTGGGGCATCAAGCAGCTCC  
AGGCAAGAATCCTGGCTGTGGAAAGATACCTAAAGGATCAACAGCTCCTGGGGATTTGGGGTTG  
CTCTGGAAAACCTCATTTGCACCACTGCTGTGCCTTGGAAATGCTAGTTGGAGTAATAAATCTCTG  
GAACAGATTTGGAATCACACGACCTGGATGGAGTGGGACAGAGAAATTAACAATTACACAAGCT  
TAATACACTCCTTAATTGAAGAATCGCAAAACCAGCAAGAAAAGAATGAACAAGAATTATTGGA  
ATTAGATAAATGGGCAAGTTTGTGGAATTGGTTTAAACATAACAAATTGGCTGTGGTATATAAAA  
TTATTCATAATGATAGTAGGAGGCTTGGTAGGTTTAAAGAATAGTTTTTTGCTGTACTTTCTATAG  
TGAATAGAGTTAGGCAGGGATATTCACCATTATCGTTTTAGACCCACCTCCCAACCCCGAGGGG  
ACCCAGAGAGGGCCTATTTCCCATGATTCCCTTCATATTTGCATATACGATACAAGGCTGTTAGA  
GAGATAAATTAGAATTAATTTGACTGTAAACACAAAGATATTAGTACAAAATACGTGACGTAGAA  
AGTAATAATTTCTTGGGTAGTTTGCAGTTTTAAAATTATGTTTTAAAATGGACTATCATATGCT  
TACCGTAACTTGAAAGTATTTTCGATTTCTTGGCTTTATATATCTTGTGGGGAGACGAAAGGACG  
AAACACCGGAGACGGTTGTAAATGAGCACACAAAATACACATGCTAAAATATTATATTCTATGA  
CCTTTATAAAATCAACCAAATCTTCTTTTTAATAACTTTAGTATCAATAATTAGAATTTTTAT  
GTTCCTTTTTGCAAACTTTTAATAAAAATGAGCAAAAATAAAAAACGCTAGTTTTAGTAACTCG  
CGTTGTTTTCTTCACCTTTAATAATAGCTACTCCACCCTTGTTCCTAAGCGGTCAGCTCCTGC  
TTCAATCATTTTTTGGAGCATCTTCAAATGTTCTAACTCCACCAGCTGCTTTAACTAAAGCATTG  
TCTTTAACAACCTGACTTCATTAGTTTAAACATCTTCAAATGTTGCACCTGATTTTTGAAAATCCTG  
TTGATGTTTTAACAATTTCTAATCCAGCTTCAACAGCTATTTACAAGCTTTCATGATTTCTTC  
TTTTGTTAATAAACAATTTTCCATAATACATTTAACAACATGTGATCCAGCTGCTTTTTTTTACA  
GCTTTCATGTCTTCTAAAACCTAATTCATAATTTTTGTCTTTTTAATGCACCAATATTTAATACCA  
TATCAATTTCTGTTGCACCATCTTTAATTGCTTCAGAACTTCGAATGCTTTTTGTAGCTGTTGT

GCATGCACCTAGAGGAAAACCTACAACATTTGTTATTCTACATTTGTGCCTTTTAATAATTCT  
TTACAATAGCTTGTTCAATATGAATTAACACAAACTGTTGCAAAATCAAATTCATTGCTTCAT  
CACATAATTGTTAATTTTCAGCTTTTCGTAGCATCTTGTTTTAATAATGTGTGATCTATATATTT  
GTTTAGTTTCATTTTTTCTCCTATATATTCATTTTTAATTTTAATTCTTTAATAATTTTCGTCTA  
CTTTAACTTTAGCGTTTTGAACAGATTCACCAACACCTATAAAAATAAATTTTTAGTTTAGGTTT  
AGTTCCACTTGGGCGAACAGCAAATCATGACTTATCTTCTAAATAAAATTTTTAGTAAGTCTTGT  
CCTGGCATATTATACATTCATCGATGTAGTCTTCAACATTAACAACTTTAAGTCCAGCAATTT  
GAGTTAAGGGTGTGCTCTCAATGATTTTCATTAATGGTTCAATTTTTAATTTCTTTTCTTCTGG  
TTTTAAATTCAGTTTTAAAGTGAAAGTGAATATGCACCCATTTCTTTAAATAAATCTTCTAAA  
TAGTCTACTAATGTTTTATTTTTGTTTTTTATAAAATCAAGCAGCCTCTGCTATTAATATAGAAG  
CTTGTATTCCATCTTTATCTCTAGCTGAGTCATCAATTACATATCCATAACTTTCTTCATAAGC  
AAAAACAAAATTTAATCCGTTATCTTCTTCTTTAGCAATTTCTCTACCCATTCATTTAAATCCA  
GTTAAAGTTTTTACAATATTAACTCCATATTTTTTCATGAGCGATTCTATCACCCAAATCACTTG  
TTACAAAACCTGAATATAGAGCCGGATTTTTTGGAAATGCTATTTAAGCGTTTTAGATTTGATAA  
TTTTCAATCAATTAATAATGGTCCTGTTTGATTTCCATCTAATCTTACAAAATGACCATCATGT  
TTTTATTGCCATTCCAAATCTGTCAGCATCTGGGTCAATCATAATAATAATATCTGCATCATGTT  
TAATACCATATTCAAGCGGTATTTTTTCATGCAGGATCAAATTTCTGGATTTGGATTTACAACATT  
TTTTAAATGTTTCATCTTCAAATGCATGCTCTTCAACCTCAATAACGTTATATCCTGATTCACGT  
AATATTTTTGGGGTAAATTTAGTTCCTGTTCCATTAACTGCGCTAAAAATAATTTTTAAATCTT  
TTTTAGCTTCTTGCTCTTTTTTGTACGTCTCTGTTTTAGAGCTAGAAATAGCAAGTTAAAATAA  
GGCTAGTCCGTTATCAACTTGAAAAAGTGGCACCGAGTCGGTGCTTTTTTAATTAAGGATCCCC  
TCGGCGTCTCTGGTTAAGCTTGGCGTAACTAGATCTTGAGACAAATGGCAGTATTCATCCACAA  
TTTTAAAAGAAAAGGGGGGATTGGGGGGTACAGTGCAGGGGAAAGAATAGTAGACATAATAGCA  
ACAGACATACAACTAAAGAATTACAAAACAAATTACAAAATTCAAAATTTTCGGGTTTTATT  
ACAGGGACAGCAGAGATCCACTTTGGCGCCGGCTCGAGGGGG

**Sequence of AsCpf1-3xMYC vector:**

>LentiAsCpf1-3xMYC-blast  
GTCGACGGATCGGGAGATCTCCCGATCCCCTATGGTGCACCTCTCAGTACAATCTGCTCTGATGC  
CGCATAGTTAAGCCAGTATCTGCTCCCTGCTTGTGTGTTGGAGGTCGCTGAGTAGTGCGCGAGC  
AAAATTTAAGCTACAACAAGGCAAGGCTTGACCGACAATTGCATGAAGAATCTGCTTAGGGTTA  
GGGTTTTGCGCTGCTTCGCGATGTACGGGCCAGATATACGCGTTGACATTGATTATTGACTAG  
TTATTAATAGTAATCAATTACGGGGTCATTAGTTCATAGCCCATATATGGAGTTCGCGTTACA  
TAACTTACGGTAAATGGCCCGCCTGGCTGACCGCCCAACGACCCCGCCATTGACGTCAATAA  
TGACGTATGTTCCCATAGTAACGCCAATAGGGACTTTCCATTGACGTCAATGGGTGGAGTATTT  
ACGGTAAACTGCCCACTTGGCAGTACATCAAGTGTATCATATGCCAAGTACGCCCCCTATTGAC  
GTCAATGACGGTAAATGGCCCGCCTGGCATTATGCCCAGTACATGACCTTATGGGACTTTCCTA  
CTTGGCAGTACATCTACGTATTAGTCATCGCTATTACCATGGTGATGCGGTTTTGGCAGTACAT  
CAATGGGCGTGGATAGCGGTTTTGACTCACGGGGATTTCCAAGTCTCCACCCCATTTGACGTCAAT  
GGGAGTTTTGTTTTGGCACAAAATCAACGGGACTTTCCAAAATGTGTAACAACCTCCGCCCCAT  
TGACGCAAATGGGCGGTAGGCGTGTACGGTGGGAGGTCTATATAAGCAGCGCGTTTTGCCTGTA  
CTGGGTCTCTGTTAGACCAGATCTGAGCCTGGGAGCTCTCTGGCTAACTAGGGAAACCCACT  
GCTTAAGCCTCAATAAAGCTTGCCTTGAGTGTCTCAAGTAGTGTGTGCCCGTCTGTTGTGTGAC  
TCTGGTAACTAGAGATCCCTCAGACCCTTTTAGTTCAGTGTGGAAAATCTCTAGCAGTGGCGCCC  
GAACAGGGACTTGAAAGCGAAAGGGAAACCAGAGGAGCTCTCTCGACGCAGGACTCGGCTTGCT  
GAAGCGCGCACGGCAAGAGGGCGAGGGGGCGGCGACTGGTGAGTACGCCAAAATTTTTGACTAGCG

GAGGCTAGAAGGAGAGAGATGGGTGCGAGAGCGTCAGTATTAAGCGGGGGAGAATTAGATCGCG  
ATGGGAAAAAATTCGGTTAAGGCCAGGGGGAAAGAAAAAATATAAATTA AACATATAGTATGG  
GCAAGCAGGGAGCTAGAACGATTCGCAGTTAATCCTGGCCTGTTAGAAACATCAGAAGGCTGTA  
GACAAATACTGGGACAGCTACAACCATCCCTTCAGACAGGATCAGAAGAACTTAGATCATTATA  
TAATACAGTAGCAACCCCTCTATTGTGTGCATCAAAGGATAGAGATAAAAGACACCAAGGAAGCT  
TTAGACAAGATAGAGGAAGAGCAAACAAAAGTAAGACCACCGCACAGCAAGCGGCCGCTGATC  
TTCAGACCTGGAGGAGGAGATATGAGGGACAATTTGGAGAAGTGAATTATATAAATATAAAGTAG  
TAAAAATTGAACCATTAGGAGTAGCACCCACCAAGGCAAAGAGAAGAGTGGTGCAGAGAGAAAA  
AAGAGCAGTGGGAATAGGAGCTTTGTTCCCTGGGTTCTTGGGAGCAGCAGGAAGCACTATGGGC  
GCAGCGTCAATGACGCTGACGGTACAGGCCAGACAATTATTGTCTGGTATAGTGCAGCAGCAGA  
ACAATTTGCTGAGGGCTATTGAGGCGCAACAGCATCTGTTGCAACTCACAGTCTGGGGCATCAA  
GCAGCTCCAGGCAAGAATCCTGGCTGTGGAAAGATACCTAAAGGATCAACAGCTCCTGGGGATT  
TGGGGTTGCTCTGGAAAACCTCATTTGCACCACTGCTGTGCCTTGGAAATGCTAGTTGGAGTAATA  
AATCTCTGGAACAGATTTGGAATCACACGACCTGGATGGAGTGGGACAGAGAAATTAACAATTA  
CACAAGCTTAATACACTCCTTAATTGAAGAATCGCAAAACCAGCAAGAAAAGAATGAACAAGAA  
TTATTGGAATTAGATAAATGGGCAAGTTTGTGGAATTGGTTTAAACATAACAAATTGGCTGTGGT  
ATATAAAATTATTCATAATGATAGTAGGAGGCTTGGTAGGTTTAAAGAATAGTTTTTTGCTGTACT  
TTCTATAGTGAATAGAGTTAGGCAGGGATATTCACCATTATCGTTTTAGACCCACCTCCCAACC  
CCGAGGGGACCCGACAGGCCCGAAGGAATAGAAGAAGAAGGTGGAGAGAGAGACAGAGACAGAT  
CCATTCGATTAGTGAACGGATCGGCACTGCGTGCGCCAATTCTGCAGACAAATGGCAGTATTCA  
TCCACAATTTTTAAAAGAAAAGGGGGGATTGGGGGGTACAGTGCAGGGGAAAGAATAGTAGACAT  
AATAGCAACAGACATACAAACCTAAAGAATTACAAAACAAATTACAAAATTTCAAATTTTTTCGG  
GTTTATTACAGGGACAGCAGAGATCCAGTTTGGTTAATTAGCTAGCTAGGTCTTGAAAGGAGTG  
GGAATTGGCTCCGGTGCCTGTCAGTGGGCAGAGCGCACATCGCCACAGTCCCCGAGAAGTTGG  
GGGAGGGGTTCGGCAATTGATCCGGTGCCTAGAGAAGGTGGCGCGGGTAAACTGGGAAAGTGA  
TGTCGTGACTGGCTCCGCCTTTTTCCCGAGGGTGGGGGAGAACCGTATATAAGTGCAGTAGTC  
GCCGTGAACGTTCTTTTTTCGCAACGGGTTTGC CGCCAGAACACAGGACCGGTGCCACCATGGCG  
CCAGCGGCAAAGCGCGTAAAATTGGACCCAGCAGCCAAACGAGTAAAACCTCGATCCGGCTGCTA  
AACGAGTTAAGCTGGACACACAGTTCGAGGGCTTTACCAACCTGTATCAGGTGAGCAAGACACT  
GCGGTTTGGAGCTGATCCCACAGGGCAAGACCCTGAAGCACATCCAGGAGCAGGGCTTCATCGAG  
GAGGACAAGGCCCGCAATGATCACTACAAGGAGCTGAAGCCCATCATCGATCGGATCTACAAGA  
CCTATGCCGACCAGTGCCTGCAGCTGGTGCAGCTGGATTGGGAGAACCTGAGCGCCGCCATCGA  
CTCCTATAGAAAGGAGAAAACCGAGGAGACAAGGAACGCCCTGATCGAGGAGCAGGCCACATAT  
CGCAATGCCATCCACGACTACTTCATCGGCCGGACAGACAACCTGACCGATGCCATCAATAAGA  
GACACGCCGAGATCTACAAGGGCCTGTTCAAGGCCGAGCTGTTTAAATGGCAAGGTGCTGAAGCA  
GCTGGGCACCGTGACCACAACCGAGCACGAGAACGCCCTGCTGCGGAGCTTCGACAAGTTTACA  
ACCTACTTCTCCGGCTTTTATGAGAACAGGAAGAACGTGTTTCAGCGCCGAGGATATCAGCACAG  
CCATCCCACACCGCATCGTGCAGGACAACCTCCCAAGTTTAAAGGAGAATTGTCACATCTTCAC  
ACGCCTGATCACCGCCGTGCCCAGCCTGCGGGAGCACTTTGAGAACGTGAAGAAGGCCATCGGC  
ATCTTCGTGAGCACCTCCATCGAGGAGGTGTTTTCCCTTCCCTTTTTATAACCAGCTGCTGACAC  
AGACCCAGATCGACCTGTATAACCAGCTGCTGGGAGGAATCTCTCGGGAGGCAGGCACCGAGAA  
GATCAAGGGCCTGAACGAGGTGCTGAATCTGGCCATCCAGAAGAATGATGAGACAGCCCACATC  
ATCGCCTCCCTGCCACACAGATTCATCCCCCTGTTTAAAGCAGATCCTGTCCGATAGGAACACCC  
TGTCTTTCATCCTGGAGGAGTTTAAAGAGCGACGAGGAAGTATCCAGTCCCTTCTGCAAGTACAA  
GACACTGCTGAGAAACGAGAACGTGCTGGAGACAGCCGAGGCCCTGTTTAAACGAGCTGAACAGC  
ATCGACCTGACACACATCTTCATCAGCCACAAGAAGCTGGAGACAATCAGCAGCGCCCTGTGCG  
ACCACTGGGATACACTGAGGAATGCCCTGTATGAGCGGAGAATCTCCGAGCTGACAGGCAAGAT

CACCAAGTCTGCCAAGGAGAAGGTGCAGCGCAGCCTGAAGCACGAGGATATCAACCTGCAGGAG  
ATCATCTCTGCCGCAGGCAAGGAGCTGAGCGAGGCCTTCAAGCAGAAAACCAGCGAGATCCTGT  
CCCACGCACACGCCGCCCTGGATCAGCCACTGCCTACAACCCTGAAGAAGCAGGAGGAGAAGGA  
GATCCTGAAGTCTCAGCTGGACAGCCTGCTGGGCCTGTACCACCTGCTGGACTGGTTTGCCGTG  
GATGAGTCCAACGAGGTGGACCCCGAGTTCTCTGCCCGGCTGACCGGCATCAAGCTGGAGATGG  
AGCCTTCTCTGAGCTTCTACAACAAGGCCAGAAATTATGCCACCAAGAAGCCCTACTCCGTGGA  
GAAGTTCAAGCTGAACTTTCAGATGCCTACACTGGCCTCTGGCTGGGACGTGAATAAGGAGAAG  
AACAATGGCGCCATCCTGTTTGTGAAGAACGGCCTGTACTATCTGGGCATCATGCCAAAGCAGA  
AGGGCAGGTATAAGGCCCTGAGCTTCGAGCCCACAGAGAAAACCAGCGAGGGCTTTGATAAGAT  
GTACTATGACTACTTCCCTGATGCCGCCAAGATGATCCCAAAGTGCAGCACCCAGCTGAAGGCC  
GTGACAGCCCCTTTCAGACCCACACAACCCCCATCCTGCTGTCCAACAATTTTCATCGAGCCTC  
TGGAGATCACAAAGGAGATCTACGACCTGAACAATCCTGAGAAGGAGCCAAAGAAGTTTCAGAC  
AGCCTACGCCAAGAAAACCGGCGACCAGAAGGGCTACAGAGAGGCCCTGTGCAAGTGGATCGAC  
TTCACAAGGGATTTTCTGTCCAAGTATAACCAAGACAACCTCTATCGATCTGTCTAGCCTGCGGC  
CATCCTCTCAGTATAAGGACCTGGGCGAGTACTATGCCGAGCTGAATCCCCTGCTGTACCACAT  
CAGCTTCCAGAGAATCGCCGAGAAGGAGATCATGGATGCCGTGGAGACAGGCAAGCTGTACCTG  
TTCCAGATCTATAACAAGGACTTTGCCAAGGGCCACCACGGCAAGCCTAATCTGCACACACTGT  
ATTGGACCGGCCTGTTTTCTCCAGAGAACCTGGCCAAGACAAGCATCAAGCTGAATGGCCAGGC  
CGAGCTGTTCTACCGCCCTAAGTCCAGGATGAAGAGGATGGCACACCGGCTGGGAGAGAAGATG  
CTGAACAAGAAGCTGAAGGATCAGAAAACCCCAATCCCCGACACCCTGTACCAGGAGCTGTACG  
ACTATGTGAATCACAGACTGTCCCACGACCTGTCTGATGAGGCCAGGGCCCTGCTGCCAACGT  
GATCACCAAGGAGGTGTCTCACGAGATCATCAAGGATAGGCGCTTTACCAGCGACAAGTTCTTT  
TTCCACGTGCCTATCACACTGAACTATCAGGCCGCCAATTTCCCCTAAGTTCAACCAGAGGG  
TGAATGCCTACCTGAAGGAGCACCCCGAGACACCTATCATCGGCATCGATCGGGGCGAGAGAAA  
CCTGATCTATATCACAGTGATCGACTCCACCGCAAGATCCTGGAGCAGCGGAGCCTGAACACC  
ATCCAGCAGTTTGATTACCAGAAGAAGCTGGACAACAGGGAGAAGGAGAGGGTGGCAGCAAGGC  
AGGCCTGGTCTGTGGTGGGCACAATCAAGGATCTGAAGCAGGGCTATCTGAGCCAGGTCATCCA  
CGAGATCGTGGACCTGATGATCCACTACCAGGCCGTGGTGGTGTGGAGAACCTGAATTTCCGGC  
TTTAAGAGCAAGAGGACCGGCATCGCCGAGAAGGCCGTGTACCAGCAGTTCGAGAAGATGCTGA  
TCGATAAGCTGAATTGCCTGGTGTGAAGGACTATCCAGCAGAGAAAGTGGGAGGCGTGTGAA  
CCCATAACCAGCTGACAGACCAGTTCACCTCCTTTGCCAAGATGGGCACCCAGTCTGGCTTCCTG  
TTTTACGTGCCTGCCCATATACATCTAAGATCGATCCCCTGACCGGCTTCGTGGACCCCTTCG  
TGTGGAAAACCATCAAGAATCACGAGAGCCGCAAGCACTTCTGGAGGGCTTCGACTTTCTGCA  
CTACGACGTGAAAACCGGCGACTTCATCCTGCACTTTAAGATGAACAGAAATCTGTCTTCCAG  
AGGGCCCTGCCCGGCTTTATGCCTGCATGGGATATCGTGTTTCGAGAAGAACGAGACACAGTTG  
ACGCCAAGGGCACCCCTTTCATCGCCGGCAAGAGAATCGTGCCAGTGATCGAGAATCACAGATT  
CACCGGCAGATACCGGGACCTGTATCCTGCCAACGAGCTGATCGCCCTGCTGGAGGAGAAGGGC  
ATCGTGTTTCAGGGATGGCTCCAACATCCTGCCAAGCTGCTGGAGAATGACGATTCTCACGCCA  
TCGACACCATGGTGGCCCTGATCCGCAGCGTGCTGCAGATGCGGAACTCCAATGCCGCCACAGG  
CGAGGACTATATCAACAGCCCCGTGCGCGATCTGAATGGCGTGTGCTTCGACTCCCGGTTTCAG  
AACCAGAGTGGCCCATGGACGCCGATGCCAATGGCGCCTACCACATCGCCCTGAAGGGCCAGC  
TGCTGCTGAATCACCTGAAGGAGAGCAAGGATCTGAAGCTGCAGAACGGCATCTCCAATCAGGA  
CTGGCTGGCCTACATCCAGGAGCTGCGCAACGGATCCGGCGCAACAACTTCTCTCTGCTGAAA  
CAAGCCGGAGATGTGCAAGAGAATCCTGGACCGATGGCCAAGCCTTTGTCTCAAGAAGAATCCA  
CCCTCATTGAAAGAGCAACGGCTACAATCAACAGCATCCCCATCTCTGAAGACTACAGCGTCGC  
CAGCGCAGCTCTCTTAGCGACGGCCGCATCTTCACTGGTGTCAATGTATATCATTTTACTGGG  
GGACCTTGTGCAGAACTCGTGGTGTGGGCACTGCTGCTGCTGCGGCAGCTGGCAACCTGACTT

GTATCGTCGCGATCGGAAATGAGAACAGGGGCATCTTGAGCCCCTGCGGACGGTGCCGACAGGT  
GCTTCTCGATCTGCATCCTGGGATCAAAGCCATAGTGAAGGACAGTGATGGACAGCCGACGGCA  
GTTGGGATTTCGTGAATTGCTGCCCTCTGGTTATGTGTGGGAGGGCTAAGAATTCGATATCAAGC  
TTATCGGTAATCAACCTCTGGATTACAAAATTTGTGAAAGATTGACTGGTATTCTTAACTATGT  
TGCTCCTTTTACGCTATGTGGATACGCTGCTTTAATGCCTTTGTATCATGCTATTGCTTCCCCT  
ATGGCTTTCATTTTCTCCTCCTTGTATAAATCCTGGTTGCTGTCTCTTTATGAGGAGTTGTGGC  
CCGTTGTCAGGCAACGTGGCGTGGTGTGCACTGTGTTTGTGACGCAACCCCCACTGGTTGGGG  
CATTGCCACCACCTGTCAGCTCCTTTCCGGGACTTTTCGCTTTCCCCCTCCCTATTGCCACGGCG  
GAACTCATCGCCGCTGCCTTGCCCGCTGCTGGACAGGGGCTCGGCTGTTGGGCACTGACAATT  
CCGTGGTGTGTCGGGGAAATCATCGTCTTTTCTTGGCTGCTCGCCTGTGTTGCCACCTGGAT  
TCTGCGCGGGACGTCCTTCTGCTACGTCCCTTCGGCCCTCAATCCAGCGGACCTTCTTCCCCTG  
GGCTGCTGCCGGCTCTGCGGCTCTTCCGCGTCTTCGCCTTCGCCCTCAGACGAGTCGGATCT  
CCCTTTGGGCGCCTCCCCGCATCGATACCGTCGACCTCGAGACCTAGAAAAACATGGAGCAAT  
CACAAGTAGCAATACAGCAGCTACCAATGCTGATTGTGCCTGGCTAGAAGCACAAGAGGAGGAG  
GAGGTGGGTTTTTCCAGTCACACCTCAGGTACCTTTAAGACCAATGACTTACAAGGCAGCTGTAG  
ATCTTAGCCACTTTTTAAAAGAAAAGGGGGGACTGGAAGGGCTAATTCCTCCAACGAAGACA  
AGATATCCTTGATCTGTGGATCTACCACACACAAGGCTACTTCCCTGATTGGCAGAACTACACA  
CCAGGGCCAGGGATCAGATATCCACTGACCTTTGGATGGTGTGCTACAAGCTAGTACCAGTTGAGC  
AAGAGAAGGTAGAAGAAGCCAATGAAGGAGAGAACACCCGCTTGTACACCCTGTGAGCCTGCA  
TGGGATGGATGACCCGGAGAGAGAAGTATTAGAGTGGAGGTTTACAGCCGCCTAGCATTTCAT  
CACATGGCCCCGAGAGCTGCATCCGGACTGTACTGGGTCTCTCTGGTTAGACCAGATCTGAGCCT  
GGGAGCTCTCTGGCTAACTAGGGAACCCACTGCTTAAGCCTCAATAAAGCTTGCCCTTGAGTGCT  
TCAAGTAGTGTGTGCCCGTCTGTTGTGTGACTCTGGTAACTAGAGATCCCTCAGACCCTTTTAG  
TCAGTGTGAAAATCTCTAGCAGGGCCCGTTTTAAACCCGCTGATCAGCCTCGACTGTGCCTTCT  
AGTTGCCAGCCATCTGTTGTTTGCCCCCTCCCCCGTGCCTTCTTGGACCCTGGAAGGTGCCACTC  
CCACTGTCCTTTCTAATAAAAATGAGGAAATTGCATCGCATTGTCTGAGTAGGTGTCATTCTAT  
TCTGGGGGGTGGGGTGGGGCAGGACAGCAAGGGGGAGGATTGGGAAGACAATAGCAGGCATGCT  
GGGGATGCGGTGGGCTCTATGGCTTCTGAGGCGGAAAGAACCAGCTGGGGCTCTAGGGGGTATC  
CCCACGCGCCCTGTAGCGGCGCATTAAAGCGCGCGGGTGTGGTGGTTACGCGCAGCGTGACCCG  
TACACTTGCCAGCGCCCTAGCGCCCGCTCCTTTTCGCTTTCTTCCCTTCTTTCTCGCCACGTTT  
GCCGGCTTTCCCCGTCAAGCTCTAAATCGGGGGCTCCCTTTAGGGTTCCGATTTAGTGCTTTAC  
GGCACCTCGACCCCCAAAAAATGATTAGGGTGTGGTTACGTTAGTGGGCCATCGCCCTGATA  
GACGGTTTTTTCGCCCTTTGACGTTGGAGTCCACGTTCTTTAATAGTGGACTCTTGTTCAAACT  
GGAACAACACTCAACCCTATCTCGGTCTATTCTTTTGGATTTATAAGGGATTTTGCCGATTTCCG  
CCTATTGGTTAAAAAATGAGCTGATTTAACAAAATTTAACGCGAATTAATTCTGTGGAATGTG  
TGTCAGTTAGGGTGTGGAAAGTCCCCAGGCTCCCCAGCAGGCAGAAGTATGCAAAGCATGCATC  
TCAATTAGTCAGCAACCAGGTGTGGAAAGTCCCCAGGCTCCCCAGCAGGCAGAAGTATGCAAAG  
CATGCATCTCAATTAGTCAGCAACCATAGTCCCGCCCCTAACCTCCGCCATCCCGCCCCTAAC  
CCGCCAGTTCCGCCATTTCTCCGCCCATGGCTGACTAATTTTTTTTTATTTATGCAGAGGCCG  
AGGCCGCTCTGCCTCTGAGCTATTCCAGAAGTAGTGAGGAGGCTTTTTTGGAGGCCCTAGGCTT  
TTGCAAAAAGCTCCCGGGAGCTTGTATATCCATTTTCGGATCTGATCAGCACGTGTTGACAATT  
AATCATCGGCATAGTATATCGGCATAGTATAATACGACAAGGTGAGGAACTAAACCATGGCCAA  
GTTGACCAGTGCCGTTCCGGTGCTCACC GCGCGACGTCGCCGGAGCGGTTCGAGTTCTGGACC  
GACCGGCTCGGGTCTCCCGGGACTTCGTGGAGGACGACTTCGCCGGTGTGGTCCGGGACGACG  
TGACCCTGTTTCATCAGCGCGGTCCAGGACCAGGTGGTGCCGGACAACACCCTGGCCTGGGTGTG  
GGTGCGCGGCCTGGACGAGCTGTACGCCGAGTGGTCCGAGGTCGTGTCCACGAACCTCCGGGAC  
GCCTCCGGGCGCGCCATGACCGAGATCGGCGAGCAGCCGTGGGGGCGGGAGTTCGCCCTGCGCG

ACCCGGCCGGCAACTGCGTGCACTTCGTGGCCGAGGAGCAGGACTGACACGTGCTACGAGATTT  
CGATTCCACCCGCCCTTCTATGAAAGGTTGGGCTTCGGAATCGTTTTCCGGGACGCCGGCTGG  
ATGATCCTCCAGCGCGGGGATCTCATGCTGGAGTTCTTCGCCACCCCAACTTGTTTTATTGCAG  
CTTATAATGGTTACAAATAAAGCAATAGCATCACAAATTTACAAATAAAGCATTTTTTTTCACT  
GCATTCTAGTTGTGGTTTGTCCAAACTCATCAATGTATCTTATCATGTCTGTATAACCGTCGACC  
TCTAGCTAGAGCTTGGCGTAATCATGGTCATAGCTGTTTTCTGTGTGAAATTGTTATCCGCTCA  
CAATTCACACAACATAACGAGCCGGAAGCATAAAGTGTAAGCCTGGGGTGCCTAATGAGTGAG  
CTAACTCACATTAATTGCGTTGCGCTCACTGCCCGCTTTCAGTCGGGAAACCTGTCTGTGCCAG  
CTGCATTAATGAATCGGCCAACGCGCGGGGAGAGGCGGTTTGCGTATTGGGCGCTCTCCGCTT  
CCTCGCTCACTGACTCGCTGCGCTCGGTCGTTCCGGCTGCGGCGAGCGGTATCAGCTCACTCAA  
GGCGGTAATACGGTTATCCACAGAATCAGGGGATAACGCAGGAAAGAACATGTGAGCAAAGGC  
CAGCAAAGGCCAGGAACCGTAAAAAGGCCGCGTTGCTGGCGTTTTTCCATAGGCTCCGCCCCC  
CTGACGAGCATCACAAAATCGACGCTCAAGTCAGAGGTGGCGAAACCCGACAGGACTATAAAG  
ATACCAGGCGTTTTCCCCCTGGAAGCTCCCTCGTGCGCTCTCCTGTTCCGACCCCTGCCGCTTACC  
GGATACCTGTCCGCTTTCTCCCTTCGGGAAGCGTGGCGCTTTCTCATAGCTCACGCTGTAGGT  
ATCTCAGTTCGGTGTAGGTGCTTCGCTCCAAGCTGGGCTGTGTGCACGAACCCCCCGTTCAGCC  
CGACCGCTGCGCCTTATCCGGTAACTATCGTCTTGAGTCCAACCCGGTAAGACACGACTTATCG  
CCACTGGCAGCAGCCACTGGTAACAGGATTAGCAGAGCGAGGTATGTAGGCGGTGCTACAGAGT  
TCTTGAAGTGGTGGCCTAACTACGGCTACACTAGAAGAACAGTATTTGGTATCTGCGCTCTGCT  
GAAGCCAGTTACCTTCGGAAAAAGAGTTGGTAGCTCTTGATCCGGCAAACAACCACCGCTGGT  
AGCGGTGGTTTTTTTTTGTTTGCAAGCAGCAGATTACGCGCAGAAAAAAGGATCTCAAGAAGATC  
CTTTGATCTTTTTCTACGGGTCTGACGCTCAGTGAACGAAAACCTCACGTTAAGGGATTTTTGGT  
CATGAGATTATCAAAAAGGATCTTCACCTAGATCCTTTTTAAATTA AAAATGAAGTTTTAAATCA  
ATCTAAAGTATATATGAGTAAACTTGGTCTGACAGTTACCAATGCTTAATCAGTGAGGCACCTA  
TCTCAGCGATCTGTCTATTTTCGTTTCATCCATAGTTGCCTGACTCCCCGTCGTGTAGATAACTAC  
GATACGGGAGGGCTTACCATCTGGCCCCAGTGCTGCAATGATACCGCGAGACCCACGCTCACCG  
GCTCCAGATTTATCAGCAATAAACCAGCCAGCCGGAAGGGCCGAGCGCAGAAGTGGTCTGCAA  
CTTTATCCGCCTCCATCCAGTCTATTAATTGTTGCCGGGAAGCTAGAGTAAGTAGTTCGCCAGT  
TAATAGTTTTGCGCAACGTTGTTGCCATTGCTACAGGCATCGTGGTGTACGCTCGTCTGTTGGT  
ATGGCTTCATTCAGCTCCGGTTCCCAACGATCAAGGCGAGTTACATGATCCCCATGTTGTGCA  
AAAAAGCGGTTAGCTCCTTCGGTCCCTCCGATCGTTGTCAGAAGTAAGTTGGCCGCAGTGTTATC  
ACTCATGGTTATGGCAGCACTGCATAATTCTCTTACTGTTCATGCCATCCGTAAGATGCTTTTTCT  
GTGACTGGTGAGTACTCAACCAAGTCATTCTGAGAATAGTGTATGCGGCGACCGAGTTGCTCTT  
GCCCGGCGTCAATACGGGATAATAACCGCGCCACATAGCAGAACTTTAAAAGTGCTCATCATTGG  
AAAACGTTCTTCGGGGCGAAAACCTCTCAAGGATCTTACCCTGTTGAGATCCAGTTCGATGTAA  
CCCCTCGTGCACCCAACCTGATCTTCAGCATCTTTTACTTTTACCAGCGTTTTCTGGGTGAGCAA  
AAACAGGAAGGCAAAATGCCGCAAAAAGGGGAATAAGGGCGACACGGAAATGTTGAATACTCAT  
ACTCTTCCTTTTTCAATATTATTGAAGCATTTATCAGGGTTATTGTCTCATGAGCGGATACATA  
TTTGAATGTATTTAGAAAAATAAACAAATAGGGGTTCCGCGCACATTTCCCCGAAAAGTGCCAC  
CTGAC

**Highlight:** AsCpf1-3xMYC sequence
