# Supplementary material for: Pooled library screening with multiplexed Cpf1 library
Source: PubMed Central journal article supplement (PMC6637147; doi:10.1038/s41467-019-10963-x), 2019-07-17
Supplement: 41467_2019_10963_MOESM2_ESM.pdf [file 41467_2019_10963_MOESM2_ESM.pdf]

## Description of Additional Supplementary Files

### Title: Supplementary Data 1

Description: Library information for "Mini-Human, 1<sup>st</sup> column is the gene symbol, 2<sup>nd</sup> column is its ensemble ID, 3<sup>rd</sup> column indicates how many guides are designed, for genes that has a guides number less than 4, a stuffer non-coding pseudo-guide is added. Column 4 is the oligo information for pooled oligo synthesis, column 5 to 8 contain guide information for each guide position.

### Title: Supplementary Data 2

Description: Library information for AsCpf1 based monocistronic benchmark library.

### Title: Supplementary Data 3

Description: Library information for SpCas9 based benchmark library

### Title: Supplementary Data 4

Description: Library information for AsCpf1 based multiplexed benchmark library

### Title: Supplementary Data 5

Description: Primers used for T7E1 assays
